# Supplementary material for: Self-assembled titania–silica–sepiolite based nanocomposites for water decontamination
Source: Royal Society of Chemistry journal article supplement (doi:10.1039/b813864h), 2009-01-01
Supplement: b813864h.pdf [file b813864h.pdf]

**Supporting Information of the manuscript entitled**  
**“Self-assembled titania-silica-sepiolite based nanocomposites for water**  
**decontamination”**

by M. Nieto-Suarez et al.

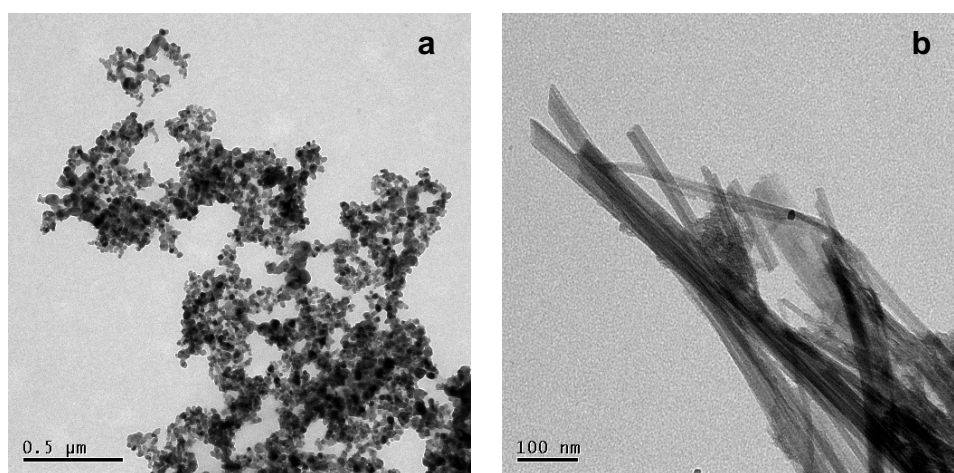

**Figure S1.** TEM images of aqueous suspensions of titania P25 nanoparticles (a) and sepiolite fibres (b) used for scaffold preparation.

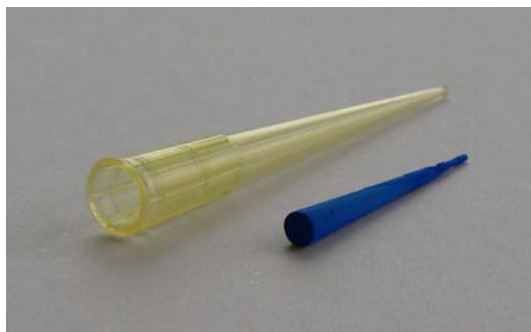

**Figure S2.** MB adsorbed onto silica/sepiolita/P-25 scaffolds prepared in this work

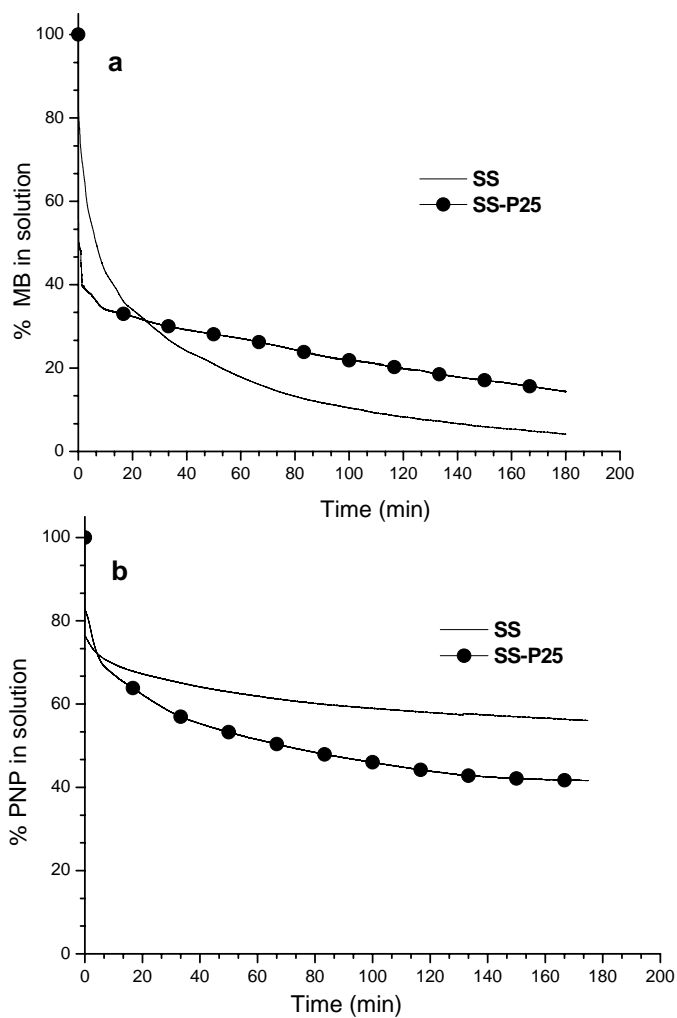

**Figure S3.** Effect of contact time on the adsorption of MB and PNP on monolithic SS and SS-P25 scaffolds. The remaining pollutant in solution was determined by absorption spectrophotometry.

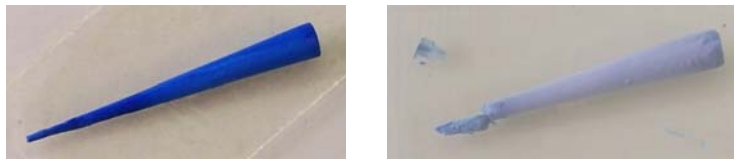

**Figure S4:** Picture of pipette-shaped SS-P25 scaffolds with MB adsorbed; (left) before and (right) after 32 hours exposure to UV light irradiation. Note irradiation was performed on the whole monolith under dry conditions.
